# Supplementary material for: Sequential Organ Failure Assessment Outperforms Quantitative Chest CT Imaging Parameters for Mortality Prediction in COVID-19 ARDS
Source: MDPI journal article supplement (doi:10.3390/diagnostics12010010), 2021-12-22
Supplement: s1 [file s1]

Supplemental Material

# Sequential Organ Failure Assessment Outperforms Quantitative Chest CT Imaging Parameters for Mortality Prediction in COVID-19 ARDS

Table S1. COVID-19 ICU Patients comparing Survivors vs. Non-Survivors.

|                                                   | Survivors (n = 53) |             | Non-Survivors (n = 36) |               | p value   |
|---------------------------------------------------|--------------------|-------------|------------------------|---------------|-----------|
| Comparison of Patient Characteristics             |                    |             |                        |               |           |
| Age                                               | 62                 | (52-70)     | 68                     | (59-81)       | p = 0.005 |
| Male Sex                                          | 40                 | (75.5%)     | 30                     | (83.3%)       | p = 0.374 |
| BMI                                               | 28                 | (25-33)     | 27                     | (25-32)       | p = 0.482 |
| ARDS Type on Admission                            |                    |             |                        |               | p = 0.634 |
| Mild                                              | 17                 | (34.7%)     | 7                      | (21.9%)       |           |
| Moderate                                          | 22                 | (44.9%)     | 17                     | (53.1%)       |           |
| Severe                                            | 8                  | (16.3%)     | 7                      | (21.9%)       |           |
| No ARDS on Admission                              | 2                  | (4.1%)      | 1                      | (3.1%)        |           |
| Patient Data during ICU Stay                      |                    |             |                        |               |           |
| Days on ICU (including external ICUs)             | 13.7               | (7.9-23.9)  | 17.3                   | (6.4-26.6)    | p = 0.789 |
| Number of Patients on Mechanical Ventilation      | 38                 | (71.7%)     | 33                     | (91.7%)       | p = 0.021 |
| Hours on Ventilator                               | 163.4              | (0.0-359.0) | 339.8                  | (115.6-590.1) | p = 0.038 |
| Number of Patients on NIV                         | 35                 | (66.0%)     | 15                     | (41.7%)       | p = 0.023 |
| Hours on NIV                                      | 3.2                | (0.0-31.0)  | 0.0                    | (0.0-11.3)    | p = 0.044 |
| Number of Patients with HDF                       | 13                 | (24.5%)     | 26                     | (72.2%)       | p < 0.001 |
| Number of Patients with ECMO                      | 2                  | (3.8%)      | 12                     | (33.3%)       | p < 0.001 |
| SOFA mean*                                        | 7.1                | (4.6-8.4)   | 13.8                   | (11.4-16.2)   | p < 0.001 |
| SOFA max*                                         | 11                 | (7-13)      | 18                     | (14-22)       | p < 0.001 |
| SOFA on Admission*                                | 7                  | (4-10)      | 11                     | (8-14)        | p < 0.001 |
| Oxygenation Index on Admission**                  | 184                | (120-247)   | 144                    | (105-199)     | p = 0.055 |
| Lactate on Admission                              | 1.2                | (0.9-1.7)   | 1.5                    | (1.1-1.8)     | p = 0.092 |
| Imaging Data                                      |                    |             |                        |               |           |
| CT Severity Score on Admission***                 | 15                 | (11-19)     | 16                     | (10-21)       | p = 0.608 |
| CT Percentage of Lung Involvement on Admission*** | 30                 | (17-53)     | 34                     | (18-67)       | p = 0.578 |
| CT Severity Score on SOFA max****                 | 17                 | (14-19)     | 18                     | (14-21)       | p = 0.616 |
| CT Percentage of Lung Involvement on SOFA max**** | 49                 | (31-56)     | 47                     | (24-64)       | p = 0.969 |
| Pulmonary Artery to Ascending Aorta Ratio         | 0.87               | (0.79-0.95) | 0.85                   | (0.77-0.91)   | p = 0.504 |
| Comorbidities                                     |                    |             |                        |               |           |
| Hypertension                                      | 29                 | (54.7%)     | 25                     | (69.4%)       | p = 0.163 |
| Diabetes                                          | 13                 | (24.5%)     | 17                     | (47.2%)       | p = 0.026 |
| Heart Disease                                     | 11                 | (20.8%)     | 19                     | (52.8%)       | p = 0.002 |

|                   |   |         |   |         |           |
|-------------------|---|---------|---|---------|-----------|
| Pulmonary Disease | 9 | (17.0%) | 7 | (19.4%) | p = 0.766 |
| Malignancy        | 3 | (5.8%)  | 6 | (16.7)  | p = 0.097 |
| Immunosuppression | 2 | (3.8%)  | 5 | (13.9%) | p = 0.082 |

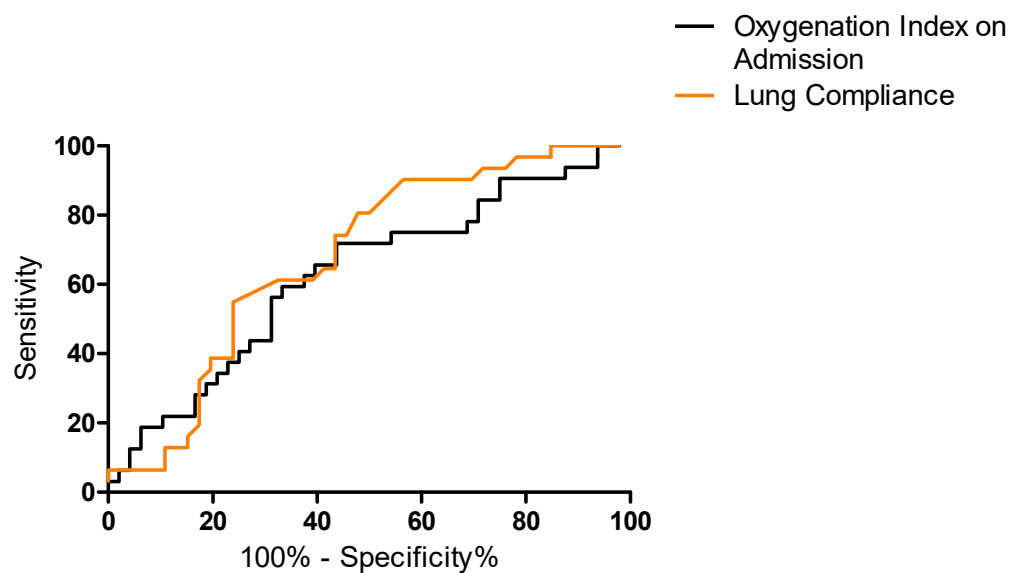

**Figure S1.** ROC curves for ox-ygenation index on ICU admission and lung compliance on ICU admission.
